# Supplementary material for: Cover Crop Species Affect N2O Emissions at Hotspot Moments of Summer Crops
Source: Frontiers journal article supplement (doi:10.3389/fsoil.2022.903387), 2022-06-14
Supplement: Table_1.docx [file Table_1.docx]

Supplementary Material

# Supplementary Table 1

**Supplementary Table 1.** Description of the crop and weather conditions in each measurement date

| Date | Crop and weather conditions |
| --- | --- |
| 17-oct-17 | After cover crops termination and maize planting. No rainfall in the previous days. |
| 20-oct-17 | After cover crops termination and maize planting. 12 mm rainfall in the previous 2 days |
| 29-nov-17 | 7 days after N fertilization (N application at V5-6 stage of maize). No rainfall in the previous days. |
| 04-dec-17 | 12 days after N fertilization. 25.2 mm rainfall in the previous 2 days. |
| 06-dec-17 | 14 days after N fertilization. No additional rainfall. |
| 19-mar-18 | Maize senescence. 18 mm rainfall in the previous 2 days |
| 03-may-18 | After maize harvest. 105.4 mm rainfall in the previous 4 days. |
| 01-nov-18 | After cover crops termination. 42.6 mm rainfall in the previous 3 days. |
| 12-dec-18 | V3-4 stage of soybean. 82.4 mm rainfall in the previous 3 days. |
| 08-jan-19 | R1 stage of soybean. 43.6 mm rainfall in the previous 3 days. |
| 03-apr-19 | Soybean senescence. No substantial rainfall in the previous 2 weeks. |
| 10-may-19 | After soybean harvest. 20.4 mm rainfall the previous day. |
